# Supplementary figures and images for: MaSMG7-Mediated Degradation of MaERF12 Facilitates Fusarium oxysporum f. sp. cubense Tropical Race 4 Infection in Musa acuminata
Source: MDPI journal article supplement (doi:10.3390/ijms25063420), 2024-03-18

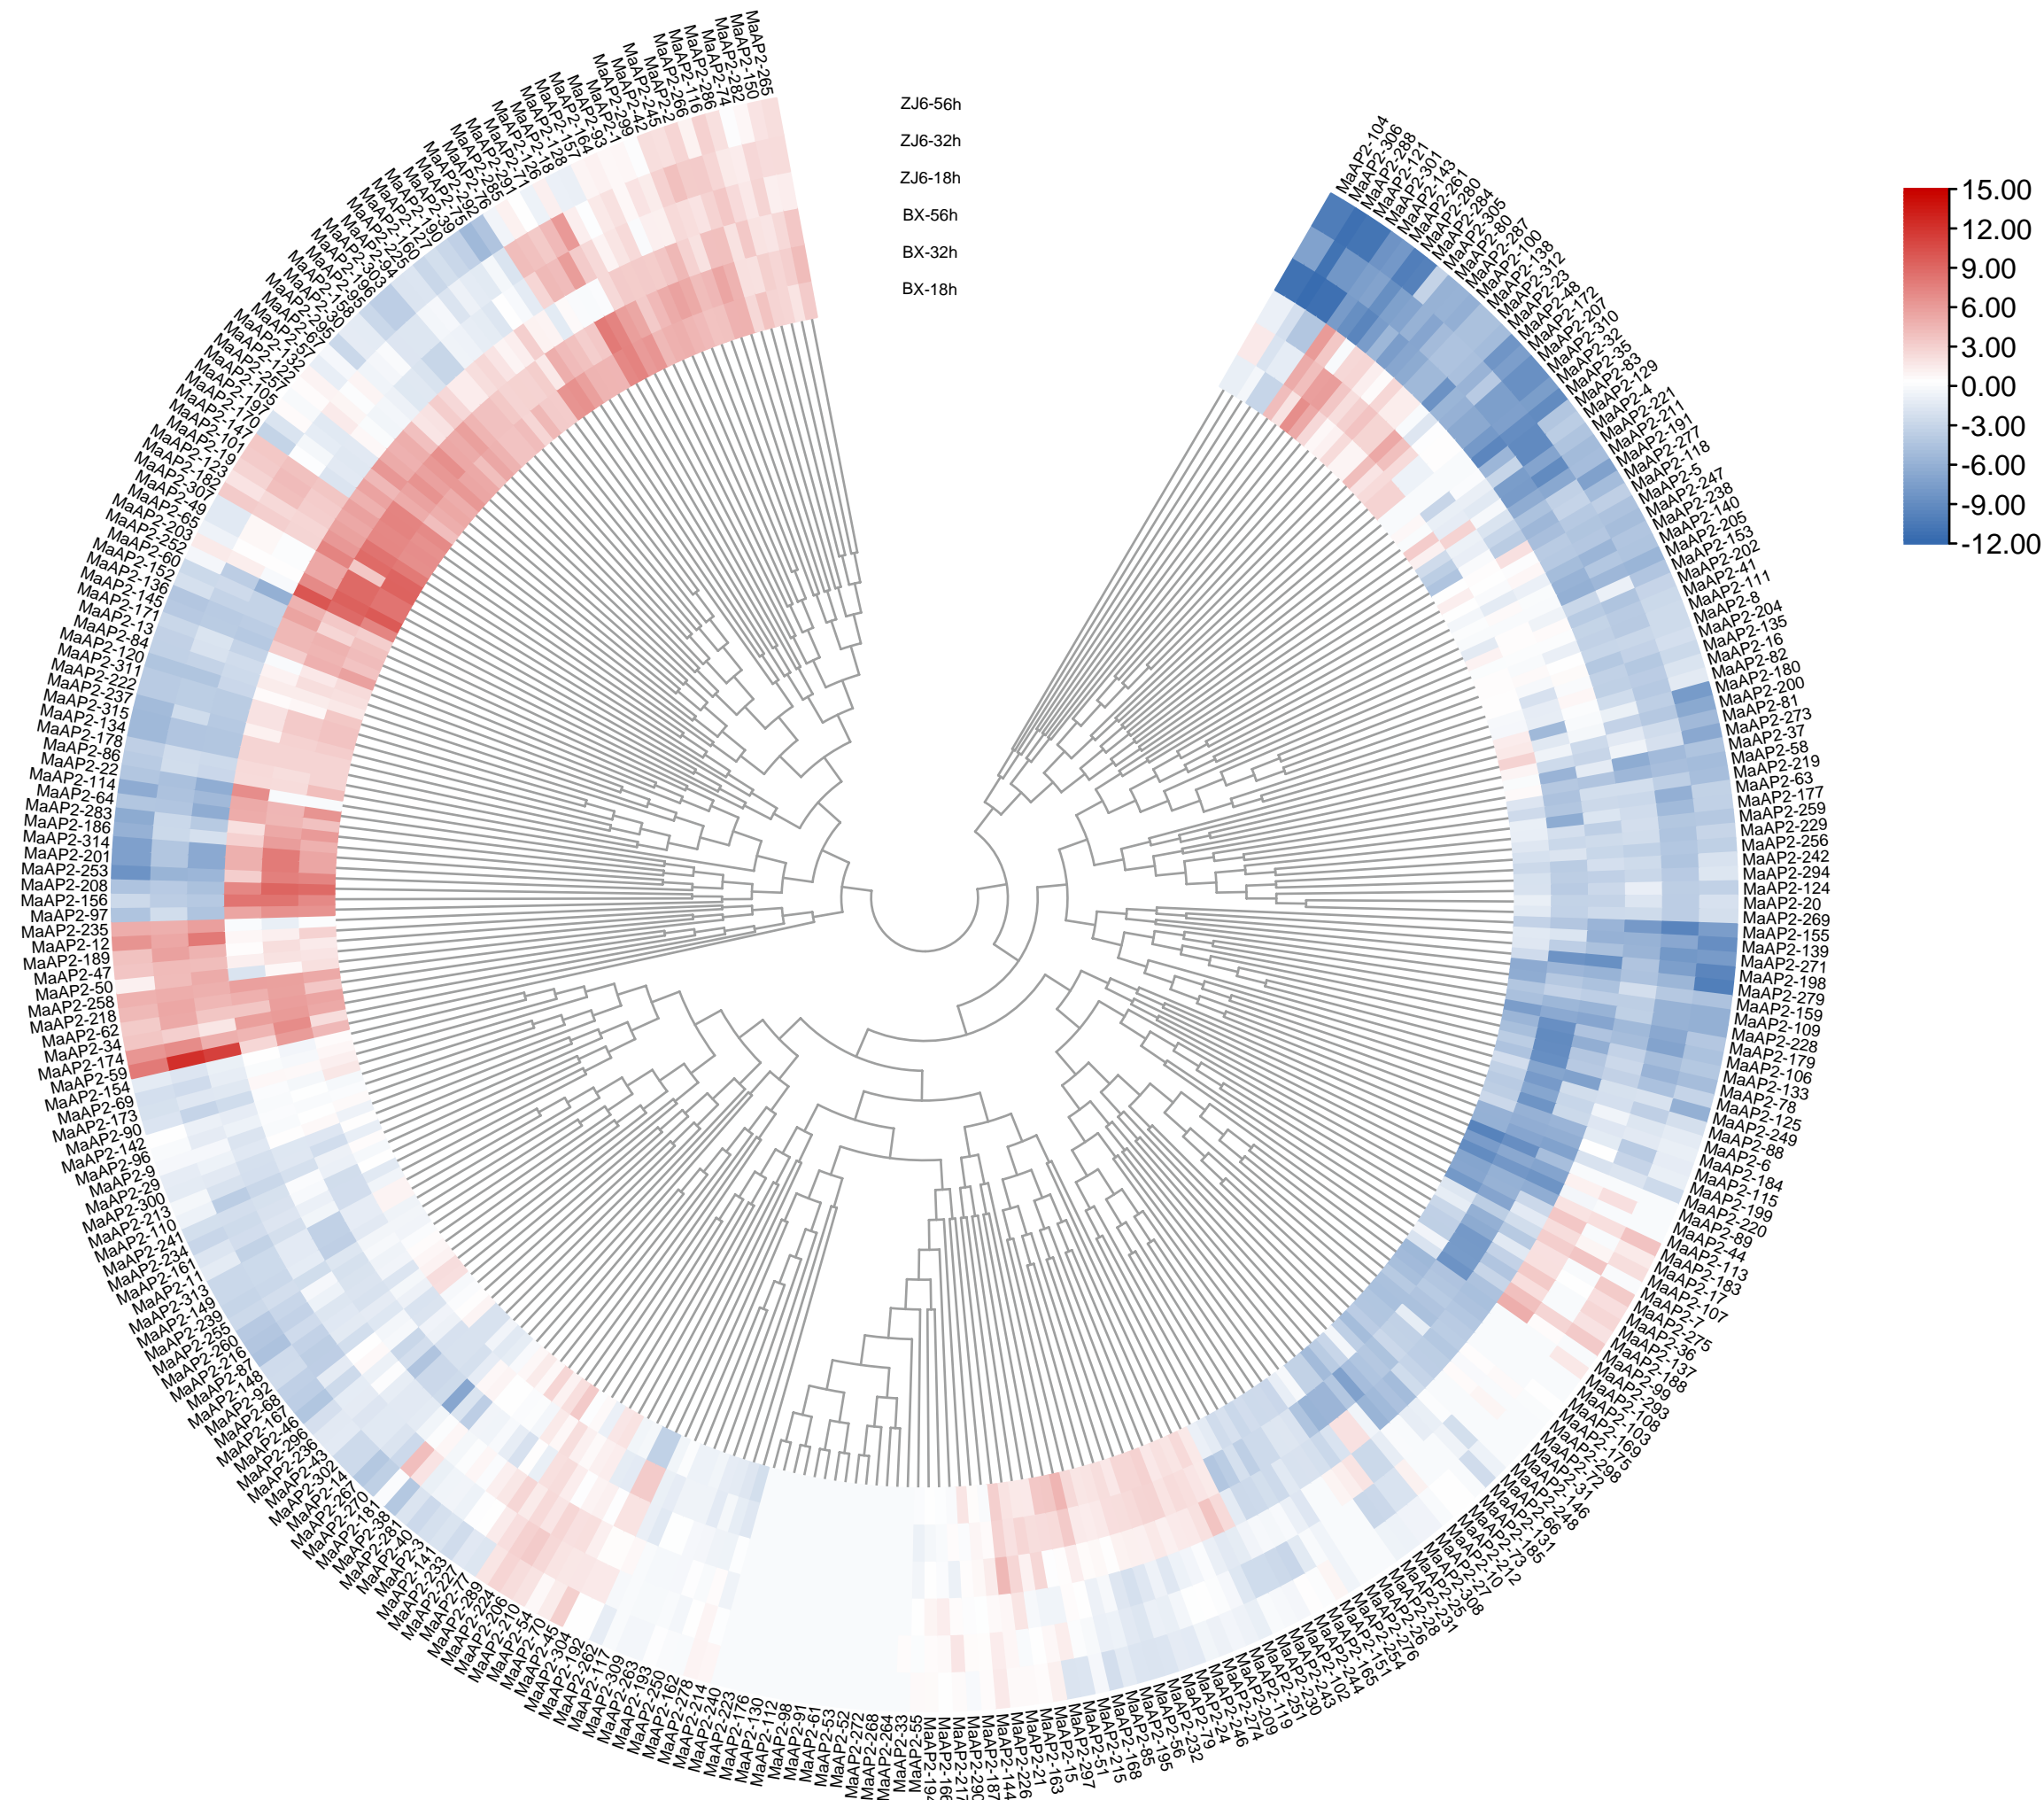

Supplement: s1 [file s1]
